# Supplementary material for: Non-symmetric superparamagnetic clusters in the relaxor manganites Sr2−xBixMnTiO6 (0 ≤ x ≤ 0.75)
Source: Royal Society of Chemistry journal article supplement (doi:10.1039/c2jm30670k), 2012-01-01
Supplement: c2jm30670k.pdf [file c2jm30670k.pdf]

## Non symmetric superparamagnetic clusters in the relaxor manganites $\text{Sr}_{2-x}\text{Bi}_x\text{MnTiO}_6$ ( $0 \leq x \leq 0.75$ )

Inmaculada Álvarez-Serrano,<sup>a,\*</sup> M. Luisa López,<sup>a</sup> Fausto Rubio,<sup>b</sup> Mar García-Hernández,<sup>c</sup> Gabriel J. Cuello,<sup>d</sup> Carlos Pico<sup>a</sup> and M.Luisa Veiga<sup>a</sup>

### Supporting information

Table S1. Obtained parameters from deconvolution of Raman spectra at 98K

| 98K   | x=0.25          |              |              |           | x=0.50          |              |              |           | Bi75            |              |              |           |
|-------|-----------------|--------------|--------------|-----------|-----------------|--------------|--------------|-----------|-----------------|--------------|--------------|-----------|
| BANDS | Intensity (a.u) | width (cm-1) | Shift (cm-1) | Norm_Area | Intensity (a.u) | width (cm-1) | Shift (cm-1) | Norm_Area | Intensity (a.u) | width (cm-1) | Shift (cm-1) | Norm_Area |
| 1     | 352,67          | 76,31        | 1136,43      | 0,027     | 256,15          | 81,11        | 1125,25      | 0,017     | 522,49          | 70,52        | 1133,89      | 0,027     |
| 2     | 790,33          | 87,48        | 1065,65      | 0,07      | 465,12          | 79,34        | 1061,35      | 0,03      | 1192,26         | 89,27        | 1064,72      | 0,078     |
| 3     | 1331,85         | 79,28        | 971,99       | 0,107     | 812,01          | 76,81        | 973,02       | 0,051     | 1746,91         | 75,72        | 975,48       | 0,097     |
| 4     | 1660,51         | 65,15        | 913,51       | 0,11      | 1283,02         | 70,42        | 913,38       | 0,074     | 2788,95         | 73,36        | 913,94       | 0,15      |
| 5     | 950,57          | 85,21        | 845,11       | 0,082     | 950,67          | 79,49        | 840,01       | 0,062     | 978,38          | 78,89        | 837,64       | 0,057     |
| 6     | 1728,22         | 70,43        | 774,49       | 0,123     | 2550            | 81,82        | 762,92       | 0,171     | 1043,15         | 92,33        | 778,48       | 0,071     |
| 7     | 630,5           | 63,47        | 700,1        | 0,041     | 1147,1          | 79,4         | 697,45       | 0,074     | 722,39          | 63,27        | 693,05       | 0,034     |
| 8     | 982,88          | 36,88        | 638,8        | 0,037     | 2250,19         | 49,62        | 630,25       | 0,091     | 890,41          | 60,76        | 633,59       | 0,04      |
| 9     | 1027,7          | 93,66        | 556,48       | 0,098     | 1700,96         | 88,1         | 552,5        | 0,122     | 1418,51         | 91,35        | 548,86       | 0,095     |
| 10    | 1161,13         | 69,44        | 488,87       | 0,082     | 1458,77         | 67,97        | 491,93       | 0,081     | 2011,58         | 73,72        | 488,65       | 0,109     |
| 11    | 975,28          | 40,42        | 443,84       | 0,04      | 2466,52         | 44,77        | 439,39       | 0,09      | 1230,63         | 67,57        | 436,83       | 0,061     |
| 12    | 371,77          | 43,48        | 395,8        | 0,016     | 785,72          | 45,06        | 384,54       | 0,029     | 575,12          | 67,36        | 385,68       | 0,028     |
| 13    | 938,17          | 175,5        | 362,89       | 0,167     | 833,82          | 157,65       | 329,39       | 0,107     | 1306,39         | 158,03       | 334,06       | 0,152     |

Table S2. Raman bands for  $\text{Sr}_{1.50}\text{Bi}_{0.50}\text{MnTiO}_6$  at 98 K and previous assignments

| Band | Bi50_98K shift (cm-1) | I (%) | Assignment                                                                            |
|------|-----------------------|-------|---------------------------------------------------------------------------------------|
| 1    | 1125,25               | 10,0  | -                                                                                     |
| 2    | 1061,35               | 18,2  | -                                                                                     |
| 3    | 973,02                | 31,8  | $A_{1g}$ symmetric breathing (stretching) of $\text{MO}_6$ octahedra                  |
| 4    | 913,38                | 50,3  |                                                                                       |
| 5    | 840,01                | 37,3  | $A_{1g}$ ordering of B-cations (1:1)                                                  |
| 6    | 762,92                | 100   | $A_{1g}$ symmetric breathing (stretching) of $\text{M(IV)}\text{O}_6$ octahedra       |
| 7    | 697,45                | 45    |                                                                                       |
| 8    | 630,25                | 88,2  | $B_{1g}$ breathing $\text{Mn}^{3+}$ J-T effect, CO/OO phenomena                       |
| 9    | 552,5                 | 66,7  | $E_g$ asymmetric breathing (antistretching) of $\text{MO}_6$ octahedra                |
| 10   | 491,93                | 57,2  | $F_{2g}$ ordering of B-cations (1:1) ; $B_{1g}$ breathing $\text{Mn}^{3+}$ J-T effect |
| 11   | 439,39                | 96,7  |                                                                                       |
| 12   | 384,54                | 30,8  | $B_{1g}$ A-cations displacement ; B-sites ordered nanodomains                         |
| 13   | 329,39                | 32,7  |                                                                                       |
